# Supplementary material for: Patterns of Anthracycline-Based Chemotherapy-Induced Adverse Drug Reactions and Their Impact on Relative Dose Intensity among Women with Breast Cancer in Ethiopia: A Prospective Observational Study
Source: Hindawi journal article supplement (doi:10.1155/2020/2636514), 2020-02-21
Supplement: f1 [file 2636514.f1.pdf]

**Supplementary material:-National Cancer Institute Common Terminology  
Criteria for Adverse Events (CTCAE) Version 4.03: for safety/toxicity  
assessment**

| Adverse Event        | Grade                                                                                                             |                                                                                                         |                                                                                                                                                                      |                                                                        |       |
|----------------------|-------------------------------------------------------------------------------------------------------------------|---------------------------------------------------------------------------------------------------------|----------------------------------------------------------------------------------------------------------------------------------------------------------------------|------------------------------------------------------------------------|-------|
|                      | 1                                                                                                                 | 2                                                                                                       | 3                                                                                                                                                                    | 4                                                                      | 5     |
| Constipation         | Occasional or intermittent symptoms; occasional use of stool softeners, laxatives, dietary modification, or enema | Persistent symptoms with regular use of laxatives or enemas; limiting instrumental ADL                  | Obstipation with manual evacuation indicated; limiting self-care ADL                                                                                                 | Life-threatening consequences; urgent intervention indicated           | Death |
| Diarrhea             | Increase of <4 stools per day over baseline; mild increase in ostomy output compared to baseline                  | Increase of 4 - 6 stools per day over baseline; moderate increase in ostomy output compared to baseline | Increase of >=7 stools per day over baseline; incontinence; hospitalization indicated; severe increase in ostomy output compared to baseline; limiting self-care ADL | Life-threatening consequences; urgent intervention indicated           | Death |
| Gastritis/stomatitis | Asymptomatic; clinical or diagnostic observations only; intervention not indicated                                | Symptomatic; altered GI function; medical intervention indicated                                        | Severely altered eating or gastric function; TPN or hospitalization indicated                                                                                        | Life-threatening consequences; urgent operative intervention indicated | Death |
| Dysgeusia            | Altered taste but no change in diet                                                                               | Altered taste with change in diet (e.g., oral supplements); noxious or unpleasant taste; loss of taste  | –                                                                                                                                                                    | –                                                                      | –     |
| Oral Mucositis       | Asymptomatic or mild symptoms; intervention not indicated                                                         | Moderate pain; not interfering with oral intake; modified diet indicated                                | Severe pain; interfering with oral intake                                                                                                                            | Life-threatening consequences; urgent intervention indicated           | Death |

**Supplementary material:-National Cancer Institute Common Terminology  
Criteria for Adverse Events (CTCAE) Version 4.03: for safety/toxicity  
assessment**

|                |                                                           |                                                                                    |                                                                                          |                                                              |       |
|----------------|-----------------------------------------------------------|------------------------------------------------------------------------------------|------------------------------------------------------------------------------------------|--------------------------------------------------------------|-------|
| Anal mucositis | Asymptomatic or mild symptoms; intervention not indicated | Symptomatic; medical intervention indicated; limiting instrumental ADL             | Severe symptoms; limiting self care ADL                                                  | Life-threatening consequences; urgent intervention indicated | Death |
| Nausea         | Loss of appetite without alteration in eating habits      | Oral intake decreased without significant weight loss, dehydration or malnutrition | Inadequate oral caloric or fluid intake; tube feeding, TPN, or hospitalization indicated |                                                              |       |

|                        |                                                                                                     |                                                                                                                                                                                        |                                                                                                                                                                                                                                                                 |                                                              |       |
|------------------------|-----------------------------------------------------------------------------------------------------|----------------------------------------------------------------------------------------------------------------------------------------------------------------------------------------|-----------------------------------------------------------------------------------------------------------------------------------------------------------------------------------------------------------------------------------------------------------------|--------------------------------------------------------------|-------|
| Vomiting               | 1 - 2 episodes (separated by 5 minutes) in 24 hrs                                                   | 3 - 5 episodes (separated by 5 minutes) in 24 hrs                                                                                                                                      | >=6 episodes (separated by 5 minutes) in 24 hrs; tube feeding, TPN or hospitalization indicated                                                                                                                                                                 | Life-threatening consequences; urgent intervention indicated | Death |
| Skin hyperpigmentation | Hyperpigmentation covering <10% BSA; no psychosocial impact                                         | Hyperpigmentation covering >10% BSA; associated psychosocial impact                                                                                                                    | –                                                                                                                                                                                                                                                               | –                                                            | –     |
| Allergic reaction      | Transient flushing or rash, drug fever <38 degrees C (<100.4 degrees F); intervention not indicated | Intervention or infusion interruption indicated; responds promptly to symptomatic treatment (e.g., antihistamines, NSAIDS, narcotics); prophylactic medications indicated for <=24 hrs | Prolonged (e.g., not rapidly responsive to symptomatic medication and/or brief interruption of infusion); recurrence of symptoms following initial improvement; hospitalization indicated for clinical sequelae (e.g., renal impairment, pulmonary infiltrates) | Life-threatening consequences; urgent intervention indicated | Death |

**Supplementary material:-National Cancer Institute Common Terminology  
Criteria for Adverse Events (CTCAE) Version 4.03: for safety/toxicity  
assessment**

|                               |                                                                                    |                                                                                                                  |                                                                                                              |                                                              |       |
|-------------------------------|------------------------------------------------------------------------------------|------------------------------------------------------------------------------------------------------------------|--------------------------------------------------------------------------------------------------------------|--------------------------------------------------------------|-------|
|                               | camouflage                                                                         | impact                                                                                                           |                                                                                                              |                                                              |       |
| Fatigue                       | Fatigue relieved by rest                                                           | Fatigue not relieved by rest; limiting instrumental ADL                                                          | Fatigue not relieved by rest, limiting self care ADL                                                         | –                                                            | –     |
| Peripheral motor neuropathy   | Asymptomatic; clinical or diagnostic observations only; intervention not indicated | Moderate symptoms; limiting instrumental ADL                                                                     | Severe symptoms; limiting self care ADL; assistive device indicated                                          | Life-threatening consequences; urgent intervention indicated | Death |
| Peripheral sensory neuropathy | Asymptomatic; loss of deep tendon reflexes or paresthesia                          | Moderate symptoms; limiting instrumental ADL                                                                     | Severe symptoms; limiting self care ADL                                                                      | Life-threatening consequences; urgent intervention indicated | Death |
| Paresthesia                   | Mild symptoms                                                                      | Moderate symptoms; limiting instrumental ADL                                                                     | Severe symptoms; limiting self care ADL                                                                      | –                                                            | –     |
| Epistaxis                     | Mild symptoms; intervention not indicated                                          | Moderate symptoms; medical intervention indicated (e.g., nasal packing, cauterization; topical vasoconstrictors) | Transfusion, radiologic, endoscopic, or operative intervention indicated (e.g., hemostasis of bleeding site) | Life-threatening consequences; urgent intervention indicated | Death |

**Supplementary material:-National Cancer Institute Common Terminology  
Criteria for Adverse Events (CTCAE) Version 4.03: for safety/toxicity  
assessment**

|                                      |                                                                                                                                                                         |                                                                                                                                                                                                                                                                            |                                                                                                                                             |                                                                                                                                                                  |       |
|--------------------------------------|-------------------------------------------------------------------------------------------------------------------------------------------------------------------------|----------------------------------------------------------------------------------------------------------------------------------------------------------------------------------------------------------------------------------------------------------------------------|---------------------------------------------------------------------------------------------------------------------------------------------|------------------------------------------------------------------------------------------------------------------------------------------------------------------|-------|
| Edema limbs                          | 5 - 10% inter-limb discrepancy in volume or circumference at point of greatest visible difference; swelling or obscuration of anatomic architecture on close inspection | >10 - 30% inter-limb discrepancy in volume or circumference at point of greatest visible difference; readily apparent obscuration of anatomic architecture; obliteration of skin folds; readily apparent deviation from normal anatomic contour; limiting instrumental ADL | >30% inter-limb discrepancy in volume; gross deviation from normal anatomic contour; limiting self-care ADL                                 |                                                                                                                                                                  |       |
| Thromboembolic event                 | Venous thrombosis (e.g., superficial thrombosis)                                                                                                                        | Venous thrombosis (e.g., uncomplicated deep vein thrombosis), medical intervention indicated                                                                                                                                                                               | Thrombosis (e.g., uncomplicated pulmonary embolism [venous], non-embolic cardiac mural [arterial] thrombus), medical intervention indicated | Life-threatening (e.g., pulmonary embolism, cerebrovascular event, arterial insufficiency); hemodynamic or neurologic instability; urgent intervention indicated | Death |
| Alanine aminotransferase increased   | >ULN - 3.0 x ULN                                                                                                                                                        | >3.0 - 5.0 x ULN                                                                                                                                                                                                                                                           | >5.0 - 20.0 x ULN                                                                                                                           | >20.0 x ULN                                                                                                                                                      | -     |
| Aspartate aminotransferase increased | >ULN - 3.0 x ULN                                                                                                                                                        | >3.0 - 5.0 x ULN                                                                                                                                                                                                                                                           | >5.0 - 20.0 x ULN                                                                                                                           | >20.0 x ULN                                                                                                                                                      | -     |
| Creatinine increased                 | >1 - 1.5 x baseline;<br>>ULN - 1.5 x ULN                                                                                                                                | >1.5 - 3.0 x baseline;<br>>1.5 - 3.0 x ULN                                                                                                                                                                                                                                 | >3.0 baseline; >3.0 - 6.0 x ULN                                                                                                             | >6.0 x ULN                                                                                                                                                       | -     |
| Alkaline phosphatase increased       | >ULN - 2.5x ULN                                                                                                                                                         | >2.5 - 5.0 x ULN                                                                                                                                                                                                                                                           | >5.0 - 20.0 x ULN                                                                                                                           | >20.0 x ULN                                                                                                                                                      | -     |
| Lymphocyte count decreased           | <LLN - 800/mm <sup>3</sup>                                                                                                                                              | <800 - 500/mm <sup>3</sup>                                                                                                                                                                                                                                                 | <500 - 200/mm <sup>3</sup>                                                                                                                  | <200/mm <sup>3</sup>                                                                                                                                             | -     |

**Supplementary material:-National Cancer Institute Common Terminology  
Criteria for Adverse Events (CTCAE) Version 4.03: for safety/toxicity  
assessment**

|                                            |                                                                                            |                                                                                                                 |                                                                                                                                                                               |                                                              |       |
|--------------------------------------------|--------------------------------------------------------------------------------------------|-----------------------------------------------------------------------------------------------------------------|-------------------------------------------------------------------------------------------------------------------------------------------------------------------------------|--------------------------------------------------------------|-------|
| Neutrophil count decreased                 | <LLN - 1500/mm <sup>3</sup>                                                                | <1500 - 1000/mm <sup>3</sup>                                                                                    | <1000 - 500/mm <sup>3</sup>                                                                                                                                                   | <500/mm <sup>3</sup>                                         | -     |
| Platelet count decreased                   | <LLN - 75,000/mm <sup>3</sup>                                                              | <75,000 - 50,000/mm <sup>3</sup>                                                                                | <50,000 - 25,000/mm <sup>3</sup>                                                                                                                                              | <25,000/mm <sup>3</sup>                                      | -     |
| White blood cell decreased                 | <LLN - 3000/mm <sup>3</sup>                                                                | <3000 - 2000/mm <sup>3</sup>                                                                                    | <2000 - 1000/mm <sup>3</sup>                                                                                                                                                  | <1000/mm <sup>3</sup>                                        | -     |
| Anemia                                     | Hemoglobin (Hgb) <LLN - 10.0 g/dL; <LLN - 6.2 mmol/L; <LLN - 100 g/L                       | Hgb <10.0 - 8.0 g/dL; <6.2 - 4.9 mmol/L; <100 - 80g/L                                                           | Hgb <8.0 g/dL; <4.9 mmol/L; <80 g/L; transfusion indicated                                                                                                                    | Life-threatening consequences; urgent intervention indicated | Death |
| Febrile neutropenia                        | -                                                                                          | -                                                                                                               | ANC <1000/mm <sup>3</sup> with a single temperature of >38.3 degrees C (101 degrees F) or a sustained temperature of >=38 degrees C (100.4 degrees F) for more than one hour. | Life-threatening consequences; urgent intervention indicated | Death |
| Hypotension                                | Asymptomatic, intervention not indicated                                                   | Non-urgent medical intervention indicated                                                                       | Medical intervention or hospitalization indicated                                                                                                                             | Life-threatening and urgent intervention indicated           | Death |
| Palmar-plantar erythrodysesthesia syndrome | Minimal skin changes or dermatitis (e.g., erythema, edema, or hyperkeratosis) without pain | Skin changes (e.g., peeling, blisters, bleeding, edema, or hyperkeratosis) with pain; limiting instrumental ADL | Severe skin changes (e.g., peeling, blisters, bleeding, edema, or hyperkeratosis) with pain; limiting self care ADL                                                           | -                                                            | -     |
| Nail discoloration                         | Asymptomatic; clinical or diagnostic observations only; intervention not indicated         | -                                                                                                               | -                                                                                                                                                                             | -                                                            | -     |

**Supplementary material:-National Cancer Institute Common Terminology  
Criteria for Adverse Events (CTCAE) Version 4.03: for safety/toxicity  
assessment**

|                |   |                                                                                          |                                                                                                                             |                                                              |       |
|----------------|---|------------------------------------------------------------------------------------------|-----------------------------------------------------------------------------------------------------------------------------|--------------------------------------------------------------|-------|
| Lung infection | – | Moderate symptoms; oral intervention indicated (e.g., antibiotic, antifungal, antiviral) | IV antibiotic, antifungal, or antiviral intervention indicated; radiologic, endoscopic, or operative intervention indicated | Life-threatening consequences; urgent intervention indicated | Death |
| Meningitis     | – | –                                                                                        | IV antibiotic, antifungal, or antiviral intervention indicated; radiologic or operative                                     | Life-threatening consequences; urgent intervention indicated | Death |

|                                   |                                         |                                                                                              |                                                                                                                |                                                              |       |
|-----------------------------------|-----------------------------------------|----------------------------------------------------------------------------------------------|----------------------------------------------------------------------------------------------------------------|--------------------------------------------------------------|-------|
|                                   |                                         |                                                                                              | intervention indicated; focal neurologic deficit                                                               |                                                              |       |
| Skin infection                    | Localized, local intervention indicated | Oral intervention indicated (e.g., antibiotic, antifungal, antiviral)                        | IV antibiotic, antifungal, or antiviral intervention indicated; radiologic or operative intervention indicated | Life-threatening consequences; urgent intervention indicated | Death |
| Mucosal infection                 | Localized, local intervention indicated | Oral intervention indicated (e.g., antibiotic, antifungal, antiviral)                        | IV antibiotic, antifungal, or antiviral intervention indicated; radiologic or operative intervention indicated | Life-threatening consequences; urgent intervention indicated | Death |
| Upper gastrointestinal hemorrhage | Mild; intervention not indicated        | Moderate symptoms; medical intervention or minor cauterization indicated                     | Transfusion, radiologic, endoscopic, or elective operative intervention indicated                              | Life-threatening consequences; urgent intervention indicated | Death |
| Soft tissue infection             | –                                       | Localized; local intervention indicated (e.g., topical antibiotic, antifungal, or antiviral) | IV antibiotic, antifungal, or antiviral intervention indicated; radiologic or operative intervention indicated | Life-threatening consequences; urgent intervention indicated | Death |

**Supplementary material:-National Cancer Institute Common Terminology  
Criteria for Adverse Events (CTCAE) Version 4.03: for safety/toxicity  
assessment**

|                             |                                                                                      |                                                                                                                                                    |                                                                                                                             |                                                              |       |
|-----------------------------|--------------------------------------------------------------------------------------|----------------------------------------------------------------------------------------------------------------------------------------------------|-----------------------------------------------------------------------------------------------------------------------------|--------------------------------------------------------------|-------|
| Upper respiratory infection | –                                                                                    | Moderate symptoms; oral intervention indicated (e.g., antibiotic, antifungal, antiviral)                                                           | IV antibiotic, antifungal, or antiviral intervention indicated; radiologic, endoscopic, or operative intervention indicated | Life-threatening consequences; urgent intervention indicated | Death |
| Tooth infection             | –                                                                                    | Localized; local intervention indicated (e.g., topical antibiotic, antifungal, or antiviral)                                                       | IV antibiotic, antifungal, or antiviral intervention indicated; radiologic or operative intervention indicated              | Life-threatening consequences; urgent intervention indicated | Death |
| Urinary tract infection     | –                                                                                    | Localized; local intervention indicated (e.g., topical antibiotic, antifungal, or antiviral)                                                       | IV antibiotic, antifungal, or antiviral intervention indicated; radiologic or operative intervention indicated              | Life-threatening consequences; urgent intervention indicated | Death |
| Dry mouth                   | Symptomatic (e.g., dry or thick                                                      | Moderate symptoms; oral                                                                                                                            | Inability to adequately                                                                                                     | –                                                            | –     |
|                             | saliva) without significant dietary alteration; unstimulated saliva flow >0.2 ml/min | intake alterations (e.g., copious water, other lubricants, diet limited to purees and/or soft, moist foods); unstimulated saliva 0.1 to 0.2 ml/min | orally; tube feeding or TPN indicated; unstimulated saliva <0.1 ml/min                                                      |                                                              |       |
| Myalgia                     | Mild pain                                                                            | Moderate pain; limiting instrumental ADL                                                                                                           | Severe pain; limiting self care ADL                                                                                         | –                                                            | –     |
| Arthralgia                  | Mild pain                                                                            | Moderate pain; limiting instrumental ADL                                                                                                           | Severe pain; limiting self care ADL                                                                                         | –                                                            | –     |

ADL=activities of daily living; ANC=absolute neutrophil count; LLN=lower limit of normal; ULN=upper limit of normal; TPN = Total Parenteral Nutrition.
